# Supplementary material
Source: publisher figshare collection journal article supplement (https://gsapubs.figshare.com/ndownloader/files/28157187)
Supplement: Supplementary file 1 [file 28157187]

## Sheet: Sheet1
Table S4 Representative electron microprobe analyses of feldspar from the biotite granites, granite porphyry dykes and MMEs
Rock type		Biotite granites																							Granite porphyry dykes							MMEs
Sample		ZK3-1-16							ZK10-1-32						ZK10-1-14										GF-01							GF-03 (phenocrystic plagioclase)							GF-03 (matrix plagioclase)
SiO2		65.206	67.42	66.061	65.515	65.704	65.658		62.478	62.362	65.776	65.558	69.244		66.815	66.927	66.613	68.528	64.945	65.135	66.729	67.084	68.971		65.757	70.547	70.618	70.844	70.534	69.911		68.933	69.078	69.511	67.954	70.124	68.061		55.46	61.2	55.29	59.88	63.82	67.63	66.86	59.79
TiO2		-	-	-	-	-	-		-	-	-	-	-		-	-	-	-	-	-	-	0.007	-		-	-	-	-	-	-		-	-	-	0.006	-	-		0.07	-	0.03	0.01	0.02	-	-	0.01
Al2O3		21.708	20.568	21.257	18.207	18.338	17.818		23.493	23.522	21.258	18.133	19.73		19.304	20.216	20.279	19.473	18.213	18.256	20.433	20.757	19.441		17.761	18.267	19.229	19.153	19.115	19.07		19.359	19.383	19.321	19.524	18.787	19.296		27.8	23.89	28.06	25.12	23.17	20.98	20.72	25.13
FeO		-	0.015	0.012	0.023	0.026	0.011		0.038	0.047	0.029	0.032	0.022		0.067	0.008	0.012	0.01	-	0.024	-	-	0.04		0.013	0.021	0.015	0.012	-	0.013		0.018	0.036	0.063	0.079	0.038	0.031		0.42	0.06	0.49	0.03	0.03	0.12	0.07	0.03
MnO		0.007	-	-	-	0.018	-		0.01	0.012	0.008	0.008	-		0.035	0.007	0.009	-	-	0.014	0.008	0.014	-		-	0.006	0.01	0.006	-	0.007		-	0.007	0.005	-	0.007	-		-	-	-	0.01	-	-	-	0.01
MgO		-	-	-	-	-	-		-	-	-	-	-		-	-	-	-	-	-	-	-	-		-	-	-	-	-	-		-	-	-	0.026	-	-		-	0.01	-	0.01	0.01	-	0.12	0.01
CaO		3.176	1.685	2.277	-	0.039	0.016		5.143	5.176	2.273	0.041	0.699		2.307	1.304	1.311	0.484	0.02	-	1.286	1.395	0.182		-	0.025	0.066	0.023	0.024	0.028		0.516	0.378	0.364	0.388	0.092	0.735		10.38	6.04	10.78	6.72	5.06	0.53	0.2	6.64
Na2O		9.705	10.365	10.337	1.027	1.625	1.433		8.603	8.512	10.293	1.49	11.07		11.196	10.707	10.195	11.651	1.212	1.202	10.897	10.805	11.594		0.173	11.862	11.673	11.911	11.377	11.78		11.178	11.48	11.236	11.315	11.891	11.323		4.42	7.56	4.44	7.46	8.26	11.46	11.06	7.32
K2O		0.498	0.537	0.321	15.656	14.788	14.869		0.453	0.442	0.454	14.845	0.31		0.319	0.591	0.721	0.217	14.991	15.112	0.694	0.412	0.142		16.54	0.122	0.084	0.129	0.089	0.136		0.101	0.184	0.086	0.497	0.058	0.15		0.89	0.58	0.96	0.59	0.55	0.44	0.58	0.59
BaO		0.083	-	-	0.005	-	0.008		0.027	-	0.008	0.011	0.038		-	-	0.011	0.027	-	-	-	-	-		-	-	-	-	-	-		-	0.027	-	0.177	-	0.053		-	-	-	-	-	-	-
Total		100.383	100.59	100.265	100.433	100.538	99.813		100.245	100.073	100.099	100.118	101.113		100.043	99.76	99.151	100.39	99.381	99.743	100.047	100.474	100.37	0	100.244	100.85	101.695	102.078	101.139	100.945	0	100.105	100.573	100.586	99.966	100.997	99.649		99.44	99.34	100.05	99.83	100.92	101.16	99.61	99.53
Or		2.77914	3.03235	1.78852	90.9323	85.5241	87.1528		2.53762	2.49298	2.52075	86.5876	1.7489		1.65484	3.29012	4.16272	1.18352	88.9661	89.213	3.78417	2.28771	0.792423		98.4349	0.671243	0.469684	0.706654	0.511373	0.75275		0.576257	1.02489	0.492205	2.75749	0.318478	0.834247		5.45047	3.38264	5.72612	3.35693	3.16871	2.40354	3.30276	3.41128
Ab		82.3318	88.9746	87.5539	9.06774	14.2864	12.7684		73.2605	72.9827	86.8775	13.2115	94.9384		88.2916	90.6116	89.4789	96.599	10.9342	10.787	90.3253	91.2053	98.3544		1.56513	99.2132	99.2203	99.1875	99.3728	99.1171		96.9506	97.2064	97.7577	95.4341	99.2572	95.7318		41.1489	67.0257	40.2591	64.5239	72.3421	95.1644	95.7405	64.3381
An		14.889	7.99301	10.6576	0	0.189474	0.0787816		24.2019	24.5243	10.6018	0.200893	3.31272		10.0535	6.09828	6.35842	2.21752	0.0997077	0	5.89056	6.50703	0.853189		0	0.115549	0.31001	0.10584	0.115842	0.130189		2.47315	1.76872	1.75007	1.8084	0.42437	3.43396		53.4007	29.5917	54.0148	32.1192	24.4892	2.43209	0.956719	32.2507
"-": below the detection limit; the electron microprobe analyses are converted to mole percent of the feldspar components by normalizing to eight oxygen atoms per formula unit.
